# Supplementary material
Source: publisher site journal article supplement (http://kjim.org/upload/media/kjim-2022-249_suppl3.pdf)
Supplement: Supplementary file 1 [file kjim-2022-249_suppl3.pdf]

**Supplementary Table 3. Cumulative incidence of CV events in hypertensive group and non-hypertensive group: relative risks of CV events in hypertensive group and non-hypertensive group over time**

| Group                    | Relative risk (from the baseline) (95% CI) |                   |                  |                  |                  |                  |
|--------------------------|--------------------------------------------|-------------------|------------------|------------------|------------------|------------------|
|                          | 6 months                                   | 1 year            | 2 years          | 3 years          | 5 years          | 10 years         |
| Major CV events or death | 6.0<br>(4.6–7.8)                           | 5.6<br>(4.8–6.5)  | 4.3<br>(3.9–4.7) | 3.4<br>(3.2–3.7) | 2.8<br>(2.6–2.9) | 1.9<br>(1.8–1.9) |
| Major CV events          | 6.1<br>(4.6–7.9)                           | 5.7<br>(4.9–6.7)  | 4.5<br>(4.0–5.0) | 3.6<br>(3.3–3.9) | 2.9<br>(2.7–3.1) | 2.2<br>(2.0–2.3) |
| Death                    | 5.8<br>(3.1–10.9)                          | 7.7<br>(5.2,11.2) | 4.8<br>(4.8–6.1) | 3.9<br>(3.3–4.7) | 2.9<br>(2.6–3.3) | 1.6<br>(1.5–1.7) |

CV, cardiovascular; CI, confidential interval.
